# Supplementary material for: Iron nanoparticles with a square pyramidal structure in mesoporous carbons as an effective catalyst toward oxygen reduction
Source: Royal Society of Chemistry journal article supplement (doi:10.1039/c6ra22549g), 2016-01-01
Supplement: c6ra22549g1.pdf [file c6ra22549g1.pdf]

**Iron nanoparticles with the square pyramidal structure in  
mesoporous carbons as an effective catalyst toward oxygen  
reduction†**

Shou-Heng Liu\*, Sheng-Wei Yang, Shih-Che Chen

**Electronic supplementary information (ESI)**

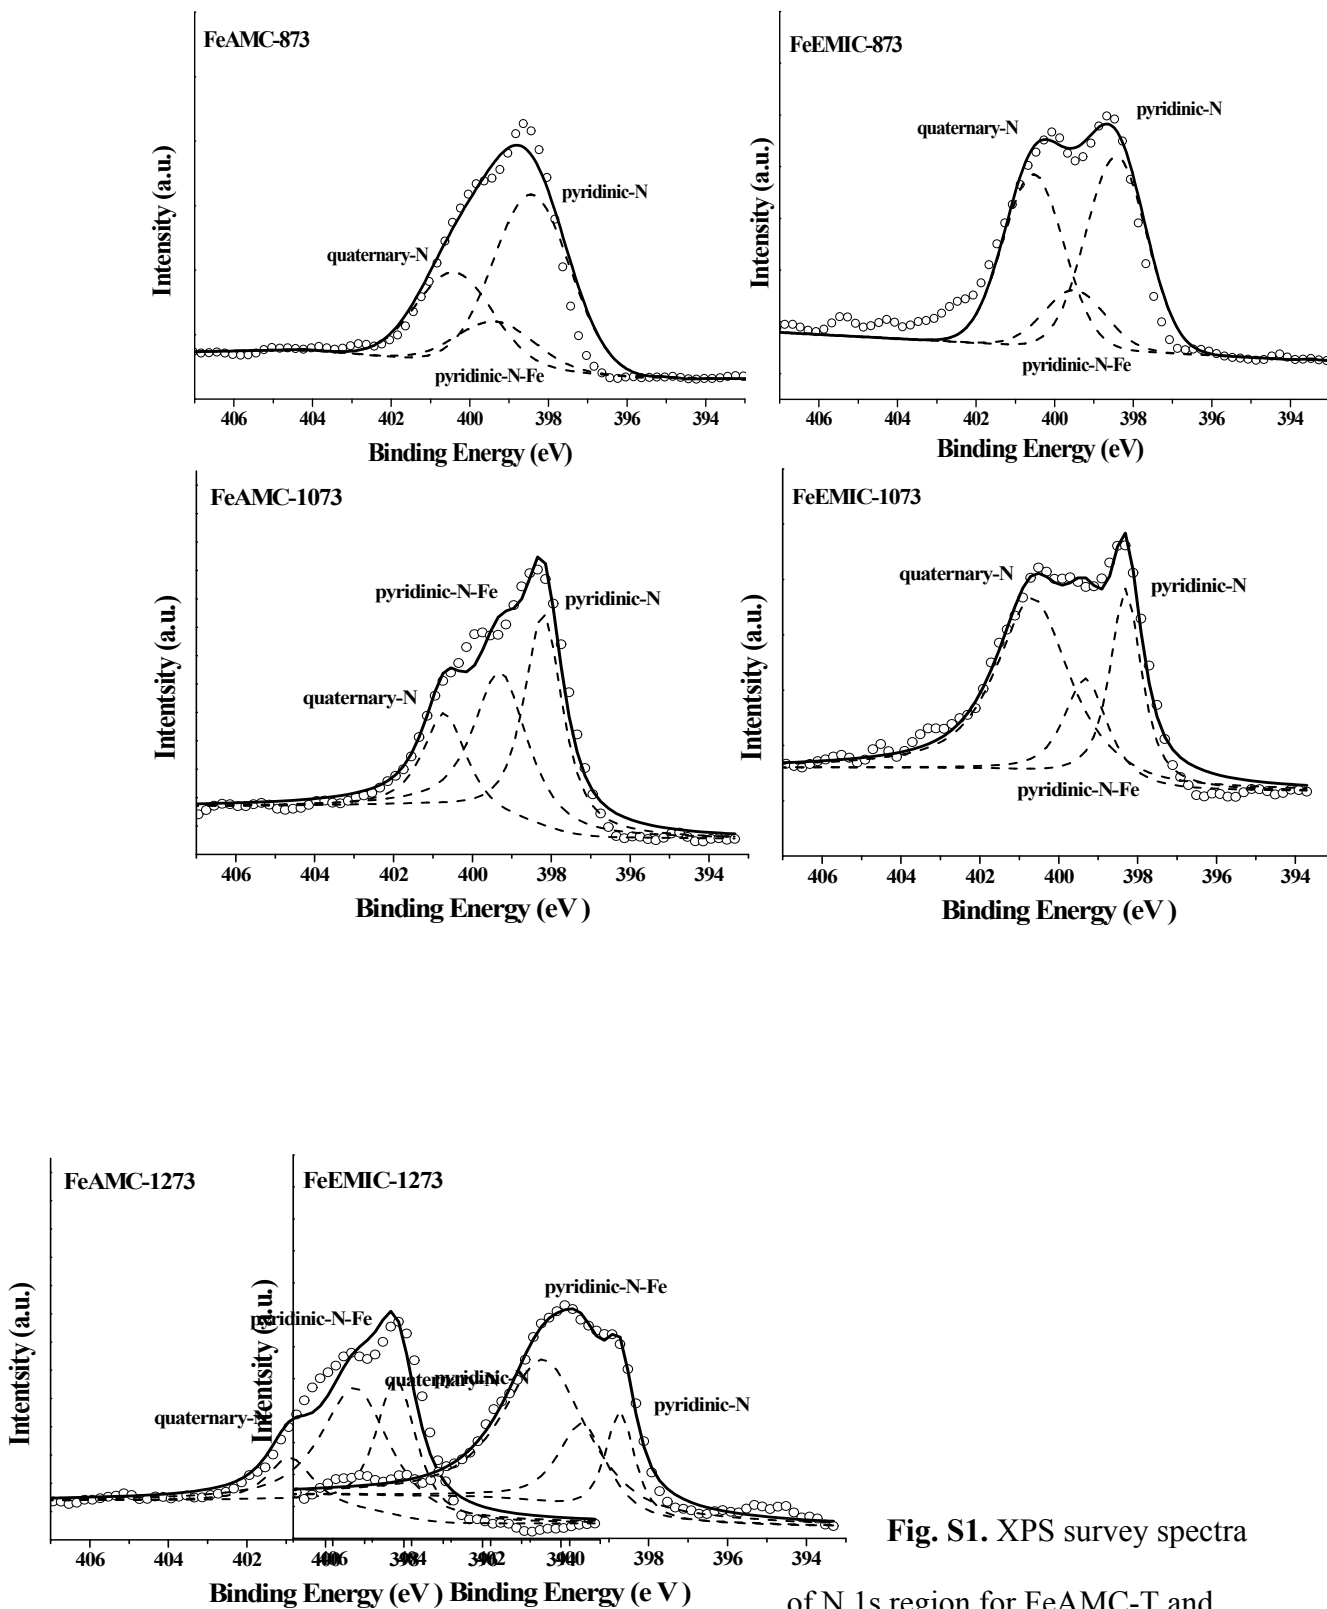

**Fig. S1.** XPS survey spectra of N 1s region for FeAMC-T and FeEMIC-T.

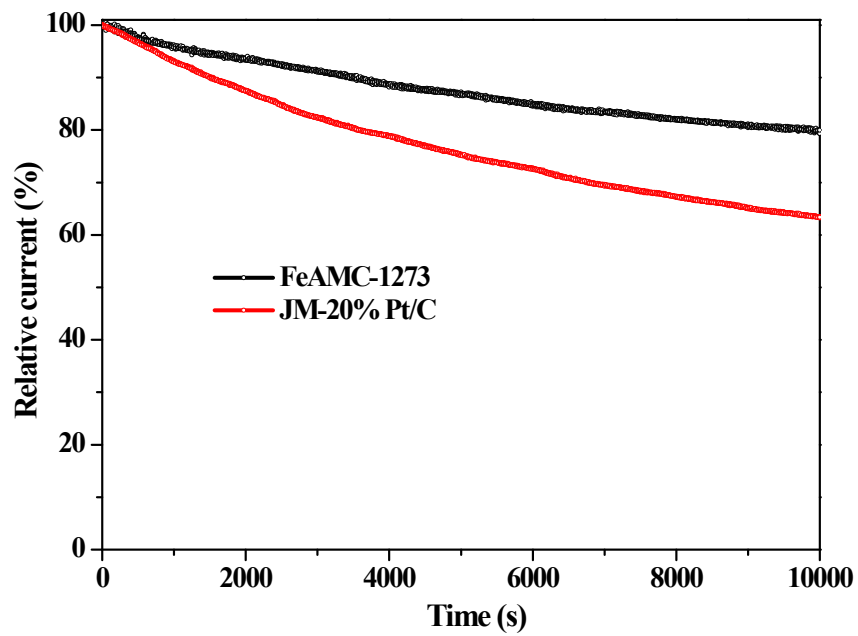

**Fig. S2.** Current-time (i-t) chronoamperometric response of FeAMC-1273 and commercial JM-20% Pt/C at 0.4 V vs. Ag/AgCl in O<sub>2</sub>-saturated 0.5 M H<sub>2</sub>SO<sub>4</sub> solution.
